# Supplementary material for: A sensitive electrochemical sensor for direct phoxim detection based on an electrodeposited reduced graphene oxide–gold nanocomposite
Source: Royal Society of Chemistry journal article supplement (doi:10.1039/c4ra15872e), 2015-01-01
Supplement: c4ra15872e1.pdf [file c4ra15872e1.pdf]

## A Sensitive Electrochemical Sensor for Direct Determination of Phoxim in Food Samples Based on Electrodeposition of Reduced Graphene Oxide-Gold Nanocomposite on Glass Carbon Electrode

Yuhong Zheng<sup>1</sup>, Li Fu<sup>1,2\*</sup>, Aiwu Wang<sup>3</sup>, Wen Cai<sup>4</sup>

### Supplementary Materials

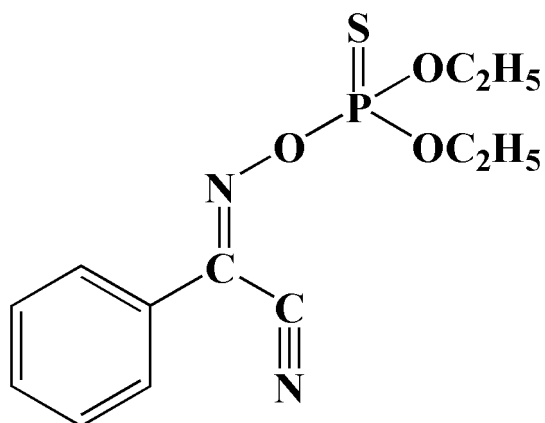

Figure S1. Molecular formula of phoxim.

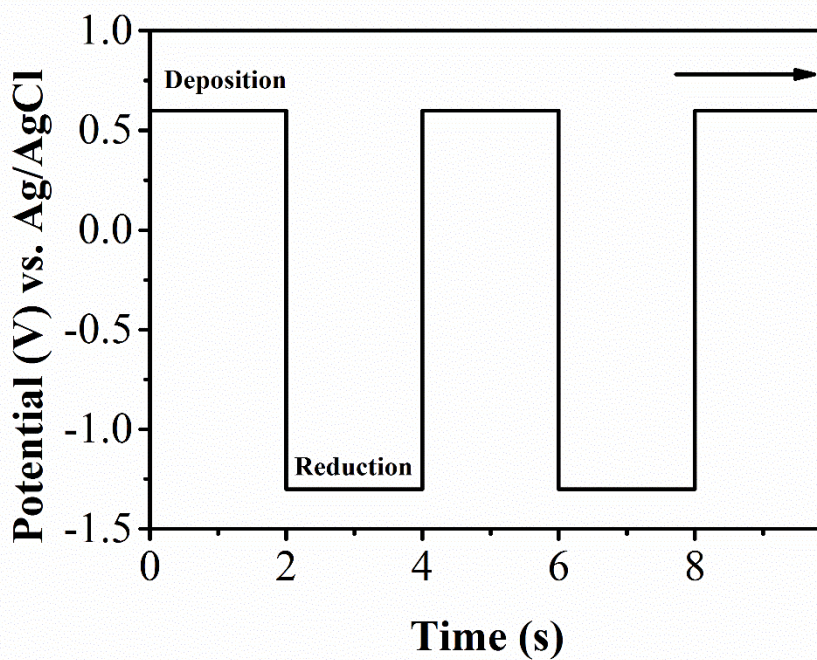

Figure S2. Pulsed electrodeposition mode for the deposition of RGO on GCE.

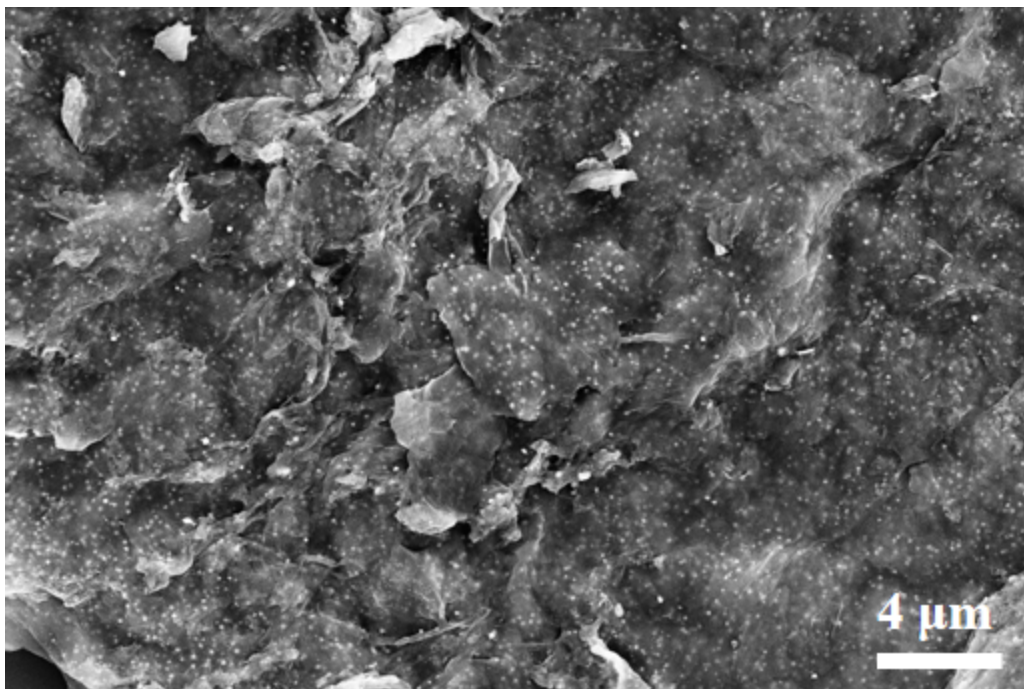

**Figure S3.** SEM image of RGO/Au nanocomposite with lower magnification.

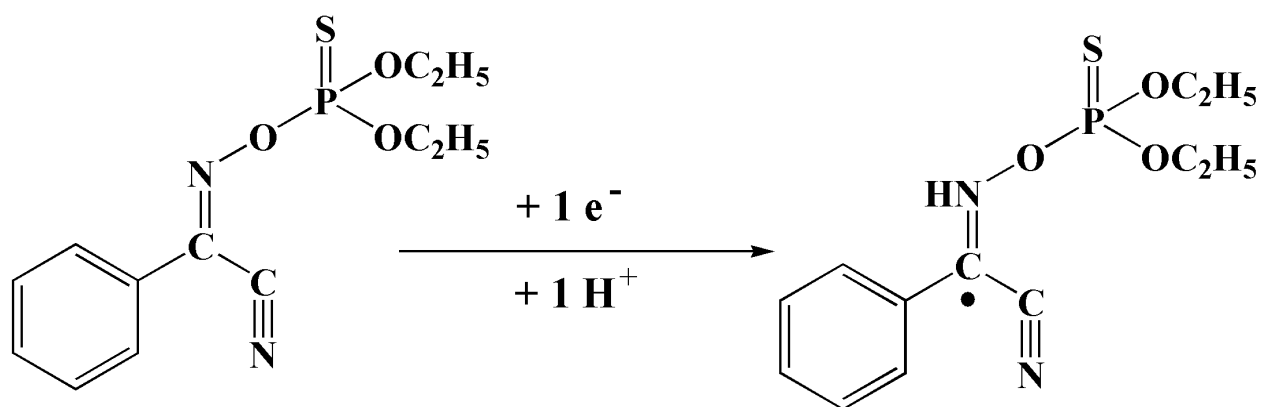

**Figure S4.** A possible electrochemical reaction mechanism of phoxim at the RGO/Au/GCE.

**Table S1.** Comparison of the analytical performance of RGO/Au/GCE with previously reported phoxim determination method.

| Method                          | LOD ( $\mu\text{M}$ ) | Linear range ( $\mu\text{M}$ ) | Reference |
|---------------------------------|-----------------------|--------------------------------|-----------|
| AChE/ZrO <sub>2</sub> /CHIT/GCE | 1.3                   | 6.6-440                        | 1         |
| Graphene/GCE                    | 0.008                 | 0.02-2                         | 2         |
| P3MT/NGE/GCE                    | 0.0064                | 0.2–2.0                        | 3         |
| RGO/Au/GCE                      | 0.003                 | 0.01–10                        | This work |

**Table S2.** Summary of interference study of phoxim determination using RGO/Au/GCE.

| Interference species | RSD(%) | Interference species | RSD(%) |
|----------------------|--------|----------------------|--------|
| Na <sup>+</sup>      | 0.66   | Ascorbic acid        | 4.18   |
| Zn <sup>2+</sup>     | 1.20   | Uric acid            | 2.01   |
| Fe <sup>3+</sup>     | 3.66   | Malathion            | 1.45   |
| Ca <sup>2+</sup>     | 1.02   | Methyl isofenphos    | 0.86   |
| K <sup>+</sup>       | 0.56   | Thimet               | 1.44   |
| Mg <sup>2+</sup>     | 0.22   | Methamidophos        | 2.09   |
| Glutamic acid        | 1.45   | Parathion            | 4.33   |
| Glucose              | 3.02   | Methyl parathion     | 4.57   |

1. Y. Yang, M. Guo, M. Yang, Z. Wang, G. Shen and R. Yu, *International Journal of Environmental Analytical Chemistry*, 2005, **85**, 163-175.
2. M. Chao and M. Chen, *Food Anal. Methods*, 2014, **7**, 1729-1736.
3. L. Wu, W. Lei, Z. Han, Y. Zhang, M. Xia and Q. Hao, *Sensors and Actuators B: Chemical*, 2015, **206**, 495-501.
